# Supplementary material
Source: HighWire-hosted journal article supplement (https://bmjopen.bmj.com/content/12/3/e059040)
Supplement: inline-supplementary-material-1 [file inline-supplementary-material-1.pdf]

**Appendix A: Guideline Organisations from Santesso et al. (2016)<sup>1</sup>**

| <b>Organisation</b>                                      | <b>Location</b> |
|----------------------------------------------------------|-----------------|
| American Academy of Neurology                            | United States   |
| American College of Gastroenterology                     | United States   |
| American College of Physicians                           | United States   |
| American Society of Clinical Oncology                    | United States   |
| American Urological Association, Urology Care Foundation | United States   |
| Canadian Diabetes Association                            | Canada          |
| Canadian Paediatric Society                              | Canada          |
| Centers for Disease Control and Prevention               | United States   |
| European Society for Medical Oncology                    | Europe          |
| National Comprehensive Cancer Network                    | United States   |
| National Institute for Health and Care Excellence (NICE) | United Kingdom  |
| Queensland Clinical Guidelines                           | Australia       |
| Royal College of Obstetricians and Gynaecologists        | United Kingdom  |
| Scottish Intercollegiate Guidelines Network              | Scotland        |
| University of Michigan Hospital and Health Centers       | United States   |
| UpToDate                                                 | The Netherlands |
| US Preventive Services Task Force                        | United States   |

<sup>1</sup>Santesso, N. et al. (2016), Dissemination of Clinical Practice Guidelines: A Content Analysis of Patient Versions, DOI: 10.1177/0272989X16644427
